# Supplementary material for: Efficient and Scalable Precision Genome Editing in Staphylococcus aureus through Conditional Recombineering and CRISPR/Cas9-Mediated Counterselection
Source: PubMed Central journal article supplement (PMC5821094; doi:10.1128/mbio.00067-18), 2018-02-20
Supplement: mbo001183736sf1.pdf [file mbo001183736sf1.pdf]

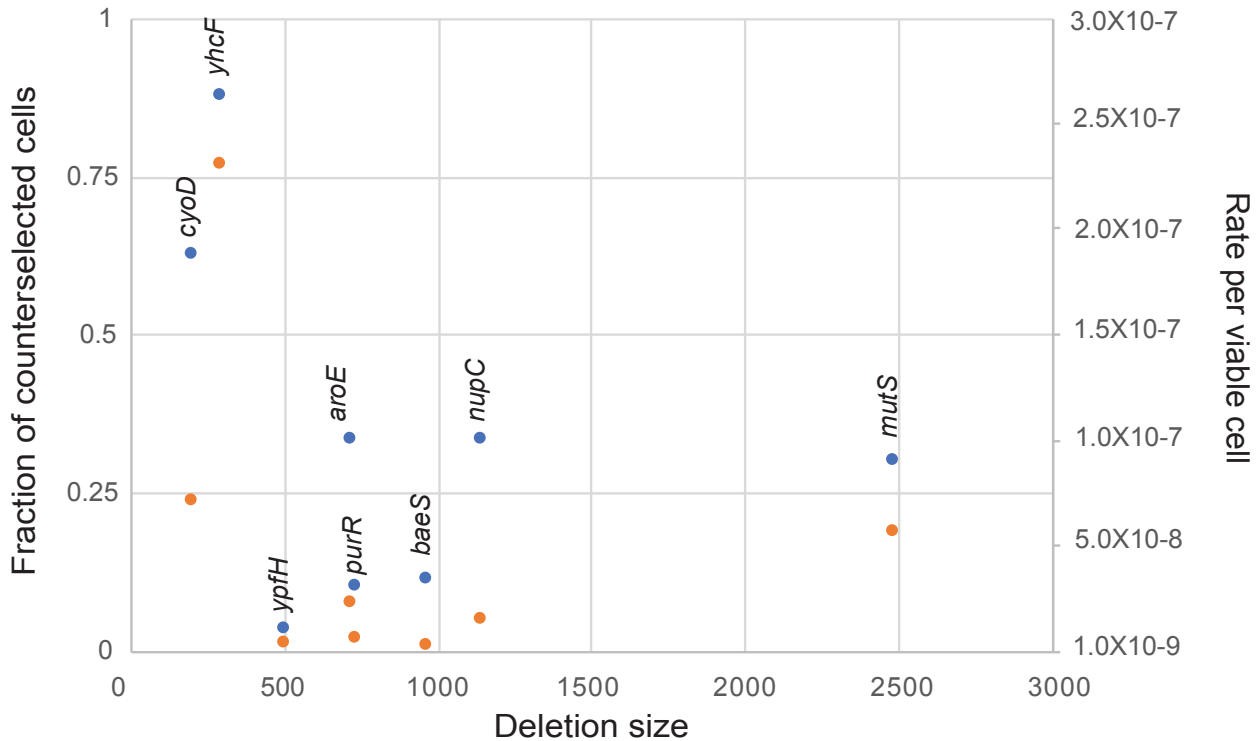

● fraction counterselected recombinants carrying intended deletion

● rate of successful recombinants per viable cell
